# Supplementary material
Source: HighWire-hosted journal article supplement (https://www.rcpjournals.org/highwire/filestream/12768/field_highwire_adjunct_files/2/S11._Further_factors_affecting_post-COVID_symptom_burden_in_patients_following_admission_for_COVID_pneumonia..pdf)
Supplement: S11._Further_factors_affecting_post-COVID_symptom_burden_in_patients_following_admission_for_COVID_pneumonia..pdf [file S11._Further_factors_affecting_post-COVID_symptom_burden_in_patients_following_admission_for_COVID_pneumonia..pdf]

**a**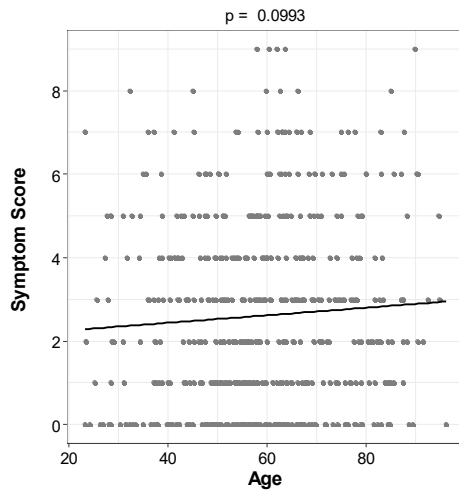**b**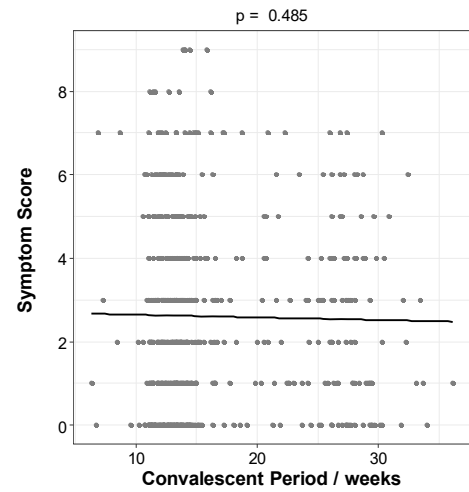

### **S11. Further factors affecting post-COVID symptom burden in patients following admission for COVID pneumonia**

Plots of Symptom Score against (a) patient age and (b) post-COVID convalescent period. P values for Spearman's Rank Correlation Coefficients.
